# Supplementary material for: Entwicklung und Validierung der „Mannheimer Skalen zur Erfassung von Handlungswissen, Reflexion und Berufsbezug (HAREBE)“ für situierte Lehrveranstaltungen an Hochschulen
Source: Atypon-hosted journal article supplement (doi:10.1026/0012-1924/a000271), 2021-06-25
Supplement: 0012-1924_a000271_esm1.pdf [file 0012-1924_a000271_esm1.pdf]

**ESM 1.** Darstellung der für die Validierung verwendeten Variablen mit Anzahl der Items, Beispielimem, Antwortmöglichkeit und Reliabilität

| <b>Variablenname</b>                                                                   | <b>Anz. Items</b> | <b>Beispielimem</b>                                                                                            | <b>Antwort-möglichkeit</b>                                                                                                         | <b>Reliabilität (Cronbachs Alpha)</b>               |
|----------------------------------------------------------------------------------------|-------------------|----------------------------------------------------------------------------------------------------------------|------------------------------------------------------------------------------------------------------------------------------------|-----------------------------------------------------|
| <i>Fachwissen</i>                                                                      | 1                 | Bitte geben Sie Ihre Note aus dem Modul "Bildungswissenschaften" aus dem Studiengang Bachelor of Education an. | Offenes Feld                                                                                                                       | -                                                   |
| <i>Fachinteresse</i> (Reinders, Hillesheim & Sebald, 2015)                             |                   | Durch meine Praxiserfahrung bin ich neugierig auf pädagogisch-bildungswissenschaftliche Theorien geworden.     | Vierstufig (1 = <i>trifft nicht zu</i> , 2 = <i>trifft eher nicht zu</i> , 3 = <i>trifft eher zu</i> , 4 = <i>trifft voll zu</i> ) | $a = .78$ bis $.83$ (Reinders et al., 2015)         |
| <i>Praktikum</i>                                                                       | 1                 | Haben Sie bereits mindestens ein studienbezogenes Praktikum absolviert?                                        | <i>Ja / Nein</i>                                                                                                                   | -                                                   |
| <i>Skala zur Allgemeinen Selbstwirksamkeitserwartung</i> (Schwarzer & Jerusalem, 1999) | 10                | Die Lösung schwieriger Probleme gelingt mir immer, wenn ich mich darum bemühe.                                 | Vierstufig (1 = <i>stimmt nicht</i> , 2 = <i>stimmt kaum</i> , 3 = <i>stimmt eher</i> , 4 = <i>stimmt genau</i> )                  | $a = .80$ bis $.90$ (Jerusalem & Schwarzer, 1999)   |
| <i>Reflexionsfähigkeit</i> (Reinders et al., 2015)                                     | 9                 | Ich denke viel über die Inhalte meines Studiums nach und versuche sie auf die Praxis zu übertragen.            | Vierstufig (siehe <i>Fachinteresse</i> )                                                                                           | $a = .62$ bis $.69$ (Reinders et al., 2015)         |
| <i>Theorie-Praxis-Reflexion</i> (Reinders et al., 2015)                                | 5                 | Im pädagogischen Alltag kommt man meistens sehr gut auch ohne Theorien aus.                                    | Vierstufig (s.o.)                                                                                                                  | $a = .66$ bis $.84$ (Reinders et al., 2015)         |
| Skala <i>Selbstwissen und Zielklarheit</i> (Kaak et al., 2013; Lipowski et al., 2015)  | 9                 | Ich weiß bereits, was mir an meinem späteren Beruf einmal wichtig ist.                                         | Vierstufig (s.o.)                                                                                                                  | $a = .81$ (Lipowski, Kaak, Kracke & Holstein, 2015) |

|                                                                                                                                                         |   |                                                                                               |                                                                                                                                                |                                                        |
|---------------------------------------------------------------------------------------------------------------------------------------------------------|---|-----------------------------------------------------------------------------------------------|------------------------------------------------------------------------------------------------------------------------------------------------|--------------------------------------------------------|
| Skala <i>Bedingungs- und Handlungswissen</i> (Kaak et al., 2013; Lipowski et al., 2015)                                                                 | 7 | Ich weiß, was ich lernen und unternehmen muss, um den Beruf zu bekommen, den ich möchte.      | Vierstufig (s.o.)                                                                                                                              | $a = .86$<br>(Lipowski et al., 2015)                   |
| Skala <i>Planungskompetenz</i> (Kaak et al., 2013; Lipowski et al., 2015)                                                                               |   | Ich habe mir für die nächste Zeit klare Ziele gesetzt, um dem Berufseinstieg näher zu kommen. | Vierstufig (s.o.)                                                                                                                              | $a = .69$<br>(Lipowski, Kaak, Kracke & Holstein, 2015) |
| Skala <i>Hoffnung auf Erfolg</i> (Lang und Fries, 2006; deutsche Übersetzung und Revision der <i>Achievement Motives Scale</i> , Gjesme & Nygard, 1970) | 5 | Ich mag Situationen, in denen ich feststellen kann, wie gut ich bin.                          | Vierstufig (1 = <i>trifft überhaupt nicht zu</i> , 2 = <i>trifft eher nicht zu</i> , 3 = <i>trifft eher zu</i> , 4 = <i>trifft völlig zu</i> ) | $a = .70$<br>(Lang & Fries, 2006)                      |
| <i>Berufstransfer</i> (Reinders et al., 2015)                                                                                                           | 5 | Ich denke, dass viele spezielle Inhalte nicht mehr im späteren Beruf benötigt werden.         | Vierstufig (siehe <i>Fachinteresse</i> )                                                                                                       | $a = .82$ bis $.90$<br>(Reinders et al., 2015)         |
| Skala <i>Lehrveranstaltung</i> ( <i>InstEvaL</i> , Erdfelder, Stahl & Pesch, 2007)                                                                      | 6 | Der Inhalt der Lehrveranstaltung war gut strukturiert.                                        | Sechsstufig (1 = <i>trifft nicht zu</i> ; 6 = <i>trifft vollkommen zu</i> )                                                                    | -                                                      |

---
