# Supplementary material for: Entwicklung und Validierung der „Mannheimer Skalen zur Erfassung von Handlungswissen, Reflexion und Berufsbezug (HAREBE)“ für situierte Lehrveranstaltungen an Hochschulen
Source: Atypon-hosted journal article supplement (doi:10.1026/0012-1924/a000271), 2021-06-25
Supplement: 0012-1924_a000271_esm2.pdf [file 0012-1924_a000271_esm2.pdf]

## ESM 2. Das Kognitive Interview

Mit einer Teilstichprobe aus 12 Studierenden der verschiedenen Fächer (8 Frauen und 4 Männer zwischen 21 und 29 Jahren, vom 2. bis 12. Fachsemester) wurde ein kognitives Interview (Lenzner, Neuert & Otto, 2016) durchgeführt. Anders als bei quantitativen Pretests werden beim kognitiven Interview nicht alle Items des Fragebogens, sondern nur ausgewählte Einzelfragen gezielt untersucht (Lenzner et al., 2016). Durch die repräsentative Auswahl der zu untersuchenden Items können typische Probleme mit dem Verständnis des Konstrukts erkannt und auf die übrigen Items übertragen werden. Ziel dieses Vorgehens ist es, Einsicht in Verarbeitungs- und Verständnisprozesse bei der Beantwortung einzelner Items zu gewinnen, um Aspekte der Inhaltsvalidität sowie Antworttendenzen untersuchen zu können (Faulbaum, Prüfer & Rexroth, 2009; Lenzner et al., 2016).

Beispielfragen aus unserem kognitiven Interview für den Bereich Frageverständnis lauten: „Welche Überschrift würdest du dieser Frage geben?“, „An welche Situation denkst du bei dieser Frage?“ und „Wie verhält sich hier jemand, der sehr gut abschneidet?“ Für den Bereich Beantwortungsprozess geben folgende Fragen ein Beispiel: „Versuche die Frage auf einer Skala von 1 bis 4 zu beantworten und dabei genau zu erklären, wie dieser Prozess abläuft“, „Wie wandelst du deine Gedanken in die Zahlen 1-4 um?“ Die zu untersuchenden Items wurden aufgrund von Repräsentativität, Komplexität, dem semantischen Gehalt, möglicher Antworttendenzen und möglicher sozialer Erwünschtheit ausgewählt. Die Interviews dauerten zwischen 30 und 45 Minuten.

Die Auswertung der kognitiven Interviews ergab: (1) Die Komplexität der Itemformulierung und die Anzahl der Satzteile in einem Item sollten verringert werden. (2) Mehrdeutig interpretierbare Wörter (wie beispielsweise das Wort professionell) sollten vermieden werden. (3) Die in den quantitativen Itemanalysen gefundene Tendenz zur Mitte, die eine verringerte Itemvarianz zur Folge und damit negative Auswirkungen auf die Itemtrennschärfe hat (Moosbrugger & Kelava, 2008), konnte in den Interviews qualitativ bestätigt werden. Vier Antwortalternativen erschienen als zu wenig. (4) Die Konstrukte Handlungs- und Reflexionskompetenz sollten inhaltlich noch stärker voneinander abgegrenzt werden.

Faulbaum, F., Prüfer, P. & Rexroth, M. (2009). *Was ist eine Frage? Was ist eine gute Frage? Die systematische*

*Evaluation der Fragenqualität* (S. 13–36). Wiesbaden: VS Verlag für Sozialwissenschaften. doi:

[https://doi.org/10.1007/978-3-531-91441-1\\_1](https://doi.org/10.1007/978-3-531-91441-1_1)

Lenzner, T., Neuert, C. & Otto, W. (2016). *Cognitive Pretesting* (2. Auflage). Mannheim: GESIS - Leibniz-

Institut für Sozialwissenschaften. Verfügbar unter: <https://www.gesis.org/en/gesis-survey->

[guidelines/instruments/quality-of-survey-data/cognitive-pretesting/](https://www.gesis.org/en/gesis-survey-guidelines/instruments/quality-of-survey-data/cognitive-pretesting/)
