# Supplementary material for: Entwicklung und Validierung der „Mannheimer Skalen zur Erfassung von Handlungswissen, Reflexion und Berufsbezug (HAREBE)“ für situierte Lehrveranstaltungen an Hochschulen
Source: Atypon-hosted journal article supplement (doi:10.1026/0012-1924/a000271), 2021-06-25
Supplement: 0012-1924_a000271_esm3.pdf [file 0012-1924_a000271_esm3.pdf]

**ESM 3.** Kennung, Wortlaut, Mittelwert und Standardabweichung, Trennschärfe sowie Faktorladung der Items der Skalen Handlungs- (HA-KOMP), Reflexions- (RE-KOMP) und Berufswahlkompetenz (BE-KOMP) sowie Handlungs- (HA-LERN), Reflexions- (RE-LERN) und Berufsorientierung (BE-LERN)

| Kennung | Wortlaut                                                                                                                               | Mittelwert<br>(SD) | Trennschärfe | Faktorladung |
|---------|----------------------------------------------------------------------------------------------------------------------------------------|--------------------|--------------|--------------|
| HA_K1   | In praxisbezogenen Situationen weiß ich was zu tun ist.                                                                                | 3.9 (1.20)         | .82          | .749         |
| HA_K2   | In praxisbezogenen Situationen kann ich die erforderlichen Vorgehensweisen sicher einsetzen.                                           | 3.9 (1.10)         | .84          | .809         |
| HA_K3   | In praxisbezogenen Situationen erkenne ich schnell mehr oder weniger geeignete Vorgehensweisen.                                        | 4.3 (1.00)         | .73          | .613         |
| HA_K4   | Ich weiß, wie ich in schwierigen praxisbezogenen Situationen handeln muss.                                                             | 3.9 (1.10)         | .89          | .866         |
| HA_K5   | In praxisbezogenen Situationen fühle ich mich dazu in der Lage, angemessene Handlungsentscheidungen zu treffen.                        | 4.2 (1.20)         | .86          | .805         |
| RE_K1   | Nach schwierigen Situationen in der Praxis erarbeite ich mithilfe theoretischer Modelle neue Handlungsmöglichkeiten.                   | 3.5 (1.20)         | .79          | .695         |
| RE_K2   | Nach schwierigen Situationen in der Praxis nutze ich mein theoretisches Wissen, um neue Vorgehensweisen für die Zukunft zu entwickeln. | 4.0 (1.20)         | .80          | .718         |
| RE_K3   | Ich nutze theoretische Modelle, um nach schwierigen Situationen in der Praxis mit diesen besser umgehen zu können.                     | 3.5 (1.20)         | .84          | .800         |
| RE_K4   | Nach schwierigen Situationen in der Praxis ziehe ich theoretische Modelle heran, um die Gründe des Problems besser zu verstehen.       | 3.7 (1.30)         | .90          | .889         |
| RE_K5   | Nach schwierigen Situationen in der Praxis greife ich zu deren Aufarbeitung auf theoretisches Wissen zurück.                           | 3.8 (1.20)         | .88          | .861         |
| BE_K1   | Ich weiß, welche Inhalte ich für einen möglichen späteren Beruf noch lernen muss.                                                      | 4.6 (1.14)         | .70          | .564         |
| BE_K2   | Ich weiß, welche Berufsfelder mit meinen Wünschen und Interessen übereinstimmen.                                                       | 5.1 (1.02)         | .68          | .599         |
| BE_K3   | Ich weiß, welche Inhalte ich in meinem späteren Berufsleben benötigen werde.                                                           | 4.6 (1.08)         | .80          | .769         |
| BE_K4   | Ich kenne die Anforderungen und benötigten Kompetenzen der für mich relevanten Berufsfelder.                                           | 4.7 (0.96)         | .83          | .792         |
| BE_K5   | Ich kann gut einschätzen, über welches berufsrelevante Wissen und Können ich bereits verfüge.                                          | 4.4 (1.02)         | .69          | .578         |
| HA_L1   | Ich habe im Seminar Vorgehensweisen gelernt, die ich [in der praktischen Tätigkeit] direkt anwenden konnte.                            | 3.6 (1.30)         | .72          | .692         |
| HA_L2   | Im Seminar wurde erörtert, welche Vorgehensweisen wir in unterschiedlichen Situationen [in der praktischen Tätigkeit] nutzen können.   | 3.8 (1.30)         | .71          | .529         |

|       |                                                                                                                                                                                  |            |     |      |
|-------|----------------------------------------------------------------------------------------------------------------------------------------------------------------------------------|------------|-----|------|
| HA_L3 | Ich habe im Seminar gelernt, geeignete von weniger geeigneten Vorgehensweisen [in der praktischen Tätigkeit] voneinander zu unterscheiden.                                       | 4.0 (1.20) | .75 | .621 |
| HA_L4 | Das im Seminar erworbene Wissen ermöglicht es mir, Vorgehensweisen bezüglich ihrer Praxistauglichkeit zu bewerten.                                                               | 4.0 (1.20) | .74 | .669 |
| HA_L5 | Im Seminar wurde anhand von Beispielen geübt, welche Handlungsoption man in bestimmten, praxisrelevanten Situationen wählen sollte.                                              | 3.8 (1.40) | .75 | .661 |
| RE_L1 | Während [der praktischen Tätigkeit] habe ich bereits Situationen erlebt, in denen theoretisches Wissen aus dem Seminar hilfreich war.                                            | 3.7 (1.40) | .78 | .653 |
| RE_L2 | Das theoretische Wissen aus dem Seminar war nützlich, um Erfahrungen aus [der praktischen Tätigkeit] besser zu verstehen.                                                        | 4.1 (1.30) | .80 | .738 |
| RE_L3 | Ich habe im Seminar Theorien gelernt, die ich [in der praktischen Tätigkeit] nutzen konnte.                                                                                      | 3.7 (1.40) | .79 | .718 |
| RE_L4 | [Die praktische Tätigkeit] hat mir geholfen zu verstehen, wie ich theoretisches Wissen aus dem Seminar praktisch anwenden kann.                                                  | 3.8 (1.30) | .79 | .736 |
| RE_L5 | Nachdem ich Erfahrungen [in der praktischen Tätigkeit] gesammelt hatte, habe ich besser verstanden, wie ich die theoretischen Inhalte aus dem Seminar in der Praxis nutzen kann. | 4.0 (1.30) | .78 | .744 |
| BE_L1 | Die im Seminar gelernten Inhalte stehen im direkten Bezug zu möglichen Berufsfeldern.                                                                                            | 3.1 (0.77) | .78 | .730 |
| BE_L2 | Ich denke, dass mich die im Seminar gelernten Inhalte auf das spätere Berufsleben vorbereiten.                                                                                   | 2.9 (0.85) | .87 | .856 |
| BE_L3 | Die meisten Inhalte des Seminars haben nur wenig Bezug zu berufsbezogenen Fragestellungen.                                                                                       | 2.9 (0.83) | .70 | .619 |
| BE_L4 | Ich denke, dass sich für einen Großteil der im Seminar besprochenen Inhalte im späteren Beruf eine Möglichkeit bieten wird, diese anzuwenden.                                    | 2.9 (0.91) | .84 | .809 |
| BE_L5 | Wenn ich das Seminar sowie [die praktische Tätigkeit] betrachte, dann fühle ich mich auf die in Frage kommenden Berufsfelder gut vorbereitet.                                    | 2.8 (0.86) | .70 | .614 |

---

*Anmerkungen:* Die in eckigen Klammern stehenden Ausdrücke sind Platzhalter; sie können hinsichtlich domänenspezifischer Tätigkeiten angepasst werden (z.B. [in der praktischen Tätigkeit] ersetzen durch „beim Unterrichten“).
